# Supplementary material for: A sustainable rural electrification based on a socio-techno-economic-environmental-political microgrid design framework
Source: Royal Society of Chemistry journal article supplement (doi:10.1039/d2ee01175a), 2022-01-01
Supplement: d2ee01175a1.pdf [file d2ee01175a1.pdf]

**S1. Criteria Judgmental Matrix in variant decision scenarios for socio-political indices ( $S_{SP}$ )**

TABLE S1.1 COMPARISON MATRIX (CRITERION X CRITERION ) FOR  $S_{SP1}$

|            | <i>PC</i> | <i>PH</i> | <i>EO</i> | <i>EL</i> | <i>CM</i> | <i>ADB</i> | <i>CI</i> | <i>PSR</i> | <i>TB</i> | <i>FIC</i> |
|------------|-----------|-----------|-----------|-----------|-----------|------------|-----------|------------|-----------|------------|
| <i>PC</i>  | 1.00      | 1.00      | 1.00      | 1.00      | 1.00      | 1.00       | 3.00      | 1.00       | 2.00      | 2.00       |
| <i>PH</i>  | 1.00      | 1.00      | 2.00      | 2.00      | 1.00      | 1.00       | 1.00      | 0.20       | 2.00      | 3.00       |
| <i>EO</i>  | 1.00      | 0.50      | 1.00      | 1.00      | 1.00      | 1.00       | 1.00      | 0.33       | 3.00      | 1.00       |
| <i>EL</i>  | 1.00      | 0.50      | 1.00      | 1.00      | 1.00      | 3.00       | 1.00      | 0.33       | 1.00      | 3.00       |
| <i>CM</i>  | 1.00      | 1.00      | 1.00      | 1.00      | 1.00      | 1.00       | 1.00      | 1.00       | 3.00      | 2.00       |
| <i>ADB</i> | 1.00      | 1.00      | 1.00      | 0.33      | 1.00      | 1.00       | 1.00      | 0.33       | 2.00      | 3.00       |
| <i>CI</i>  | 0.33      | 1.00      | 1.00      | 1.00      | 1.00      | 1.00       | 1.00      | 1.00       | 1.00      | 1.00       |
| <i>PSR</i> | 1.00      | 5.00      | 3.00      | 3.00      | 1.00      | 1.00       | 1.00      | 1.00       | 3.00      | 3.00       |
| <i>TB</i>  | 0.50      | 0.50      | 0.33      | 1.00      | 0.33      | 3.00       | 1.00      | 1.00       | 1.00      | 1.00       |
| <i>FIC</i> | 0.50      | 0.33      | 1.00      | 0.33      | 0.50      | 0.50       | 1.00      | 0.33       | 1.00      | 1.00       |

TABLE S1.2 COMPARISON MATRIX (CRITERION X CRITERION ) FOR  $S_{SP2}$

|            | <i>PC</i> | <i>PH</i> | <i>EO</i> | <i>EL</i> | <i>CM</i> | <i>ADB</i> | <i>CI</i> | <i>PSR</i> | <i>TB</i> | <i>FIC</i> |
|------------|-----------|-----------|-----------|-----------|-----------|------------|-----------|------------|-----------|------------|
| <i>PC</i>  | 1.00      | 1.00      | 1.00      | 1.00      | 1.00      | 1.00       | 1.00      | 1.00       | 2.00      | 2.00       |
| <i>PH</i>  | 1.00      | 1.00      | 2.00      | 2.00      | 1.00      | 1.00       | 1.00      | 0.20       | 2.00      | 3.00       |
| <i>EO</i>  | 1.00      | 0.50      | 1.00      | 1.00      | 1.00      | 1.00       | 1.00      | 0.33       | 3.00      | 1.00       |
| <i>EL</i>  | 1.00      | 0.50      | 1.00      | 1.00      | 1.00      | 3.00       | 1.00      | 0.33       | 1.00      | 3.00       |
| <i>CM</i>  | 1.00      | 1.00      | 1.00      | 1.00      | 1.00      | 1.00       | 1.00      | 1.00       | 3.00      | 2.00       |
| <i>ADB</i> | 1.00      | 1.00      | 1.00      | 0.33      | 1.00      | 1.00       | 1.00      | 0.33       | 2.00      | 3.00       |
| <i>CI</i>  | 1.00      | 1.00      | 1.00      | 1.00      | 1.00      | 1.00       | 1.00      | 1.00       | 1.00      | 1.00       |
| <i>PSR</i> | 1.00      | 5.00      | 3.00      | 3.00      | 1.00      | 1.00       | 1.00      | 1.00       | 3.00      | 3.00       |
| <i>TB</i>  | 0.50      | 0.50      | 0.33      | 1.00      | 0.33      | 3.00       | 1.00      | 1.00       | 1.00      | 1.00       |
| <i>FIC</i> | 0.50      | 0.33      | 1.00      | 0.33      | 0.50      | 0.50       | 1.00      | 0.33       | 1.00      | 1.00       |

TABLE S1.3 COMPARISON MATRIX (CRITERION X CRITERION ) FOR  $S_{SP3}$

|            | <i>PC</i> | <i>PH</i> | <i>EO</i> | <i>EL</i> | <i>CM</i> | <i>ADB</i> | <i>CI</i> | <i>PSR</i> | <i>TB</i> | <i>FIC</i> |
|------------|-----------|-----------|-----------|-----------|-----------|------------|-----------|------------|-----------|------------|
| <i>PC</i>  | 1.00      | 1.00      | 1.00      | 1.00      | 1.00      | 1.00       | 1.00      | 1.00       | 3.00      | 2.00       |
| <i>PH</i>  | 1.00      | 1.00      | 2.00      | 2.00      | 1.00      | 1.00       | 1.00      | 0.20       | 2.00      | 3.00       |
| <i>EO</i>  | 1.00      | 0.50      | 1.00      | 1.00      | 1.00      | 1.00       | 1.00      | 0.33       | 3.00      | 1.00       |
| <i>EL</i>  | 1.00      | 0.50      | 1.00      | 1.00      | 1.00      | 3.00       | 1.00      | 0.33       | 1.00      | 3.00       |
| <i>CM</i>  | 1.00      | 1.00      | 1.00      | 1.00      | 1.00      | 1.00       | 1.00      | 1.00       | 3.00      | 2.00       |
| <i>ADB</i> | 1.00      | 1.00      | 1.00      | 0.33      | 1.00      | 1.00       | 1.00      | 0.33       | 2.00      | 3.00       |
| <i>CI</i>  | 1.00      | 1.00      | 1.00      | 1.00      | 1.00      | 1.00       | 1.00      | 1.00       | 1.00      | 1.00       |
| <i>PSR</i> | 1.00      | 5.00      | 3.00      | 3.00      | 1.00      | 1.00       | 1.00      | 1.00       | 3.00      | 3.00       |
| <i>TB</i>  | 0.33      | 0.50      | 0.33      | 1.00      | 0.33      | 3.00       | 1.00      | 1.00       | 1.00      | 1.00       |
| <i>FIC</i> | 0.50      | 0.33      | 1.00      | 0.33      | 0.50      | 0.50       | 1.00      | 0.33       | 1.00      | 1.00       |

TABLE S1.4 COMPARISON MATRIX (CRITERION X CRITERION ) FOR  $S_{SP4}$

|            | <i>PC</i> | <i>PH</i> | <i>EO</i> | <i>EL</i> | <i>CM</i> | <i>ADB</i> | <i>CI</i> | <i>PSR</i> | <i>TB</i> | <i>FIC</i> |
|------------|-----------|-----------|-----------|-----------|-----------|------------|-----------|------------|-----------|------------|
| <i>PC</i>  | 1.00      | 1.00      | 2.00      | 1.00      | 1.00      | 1.00       | 1.00      | 1.00       | 3.00      | 1.00       |
| <i>PH</i>  | 0.50      | 1.00      | 2.00      | 2.00      | 1.00      | 1.00       | 1.00      | 0.20       | 2.00      | 3.00       |
| <i>EO</i>  | 0.50      | 0.50      | 1.00      | 1.00      | 1.00      | 1.00       | 1.00      | 0.33       | 3.00      | 1.00       |
| <i>EL</i>  | 1.00      | 0.50      | 1.00      | 1.00      | 1.00      | 3.00       | 1.00      | 0.33       | 1.00      | 3.00       |
| <i>CM</i>  | 1.00      | 1.00      | 1.00      | 1.00      | 1.00      | 1.00       | 1.00      | 1.00       | 3.00      | 2.00       |
| <i>ADB</i> | 1.00      | 1.00      | 1.00      | 0.33      | 1.00      | 1.00       | 1.00      | 0.33       | 2.00      | 3.00       |
| <i>CI</i>  | 1.00      | 1.00      | 1.00      | 1.00      | 1.00      | 1.00       | 1.00      | 1.00       | 1.00      | 1.00       |
| <i>PSR</i> | 1.00      | 5.00      | 3.00      | 3.00      | 1.00      | 1.00       | 1.00      | 1.00       | 3.00      | 3.00       |
| <i>TB</i>  | 0.33      | 0.50      | 0.33      | 1.00      | 0.33      | 3.00       | 1.00      | 1.00       | 1.00      | 1.00       |
| <i>FIC</i> | 1.00      | 0.33      | 1.00      | 0.33      | 0.50      | 0.50       | 1.00      | 0.33       | 1.00      | 1.00       |

## S2. Alternative Judgmental Matrix for evaluation on socio-political indices

TABLE S2.1 COMPARISON MATRIX (ALTERNATIVE X ALTERNATIVE) ON *PC*

|                          | $\mu_{HKES}$ | $\mu_{WTES}$ | <i>SPVEs</i> | <i>SW<sub>HHEs</sub></i> | <i>S<sub>HES</sub></i> | <i>DFGen</i> | <i>B<sub>ESS</sub></i> | <i>P<sub>HESs</sub></i> |
|--------------------------|--------------|--------------|--------------|--------------------------|------------------------|--------------|------------------------|-------------------------|
| $\mu_{HKES}$             | 1.000        | 5.000        | 1.000        | 7.000                    | 5.000                  | 3.000        | 1.000                  | 1.000                   |
| $\mu_{WTES}$             | 1.000        | 1.000        | 0.500        | 1.000                    | 1.000                  | 0.500        | 1.000                  | 1.000                   |
| <i>S<sub>PVEs</sub></i>  | 1.000        | 2.000        | 1.000        | 5.000                    | 3.000                  | 3.000        | 1.000                  | 1.000                   |
| <i>SW<sub>HHEs</sub></i> | 0.143        | 1.000        | 0.200        | 1.000                    | 1.000                  | 0.333        | 0.500                  | 1.000                   |
| <i>S<sub>HES</sub></i>   | 0.200        | 1.000        | 0.333        | 1.000                    | 1.000                  | 1.000        | 0.333                  | 0.500                   |
| <i>DFGen</i>             | 0.333        | 2.000        | 0.333        | 3.000                    | 1.000                  | 1.000        | 1.000                  | 1.000                   |
| <i>B<sub>ESS</sub></i>   | 1.000        | 1.000        | 1.000        | 2.000                    | 3.000                  | 1.000        | 1.000                  | 1.000                   |
| <i>P<sub>HESs</sub></i>  | 1.000        | 1.000        | 1.000        | 1.000                    | 2.000                  | 1.000        | 1.000                  | 1.000                   |

TABLE S2.2 COMPARISON MATRIX (ALTERNATIVE X ALTERNATIVE) ON *PH*

|                          | $\mu_{HKES}$ | $\mu_{WTES}$ | <i>SPVEs</i> | <i>SW<sub>HHEs</sub></i> | <i>S<sub>HES</sub></i> | <i>DFGen</i> | <i>B<sub>ESS</sub></i> | <i>P<sub>HESs</sub></i> |
|--------------------------|--------------|--------------|--------------|--------------------------|------------------------|--------------|------------------------|-------------------------|
| $\mu_{HKES}$             | 1.00         | 3.00         | 1.00         | 3.00                     | 3.00                   | 3.00         | 1.00                   | 1.00                    |
| $\mu_{WTES}$             | 1.00         | 1.00         | 0.33         | 1.00                     | 1.00                   | 1.00         | 1.00                   | 1.00                    |
| <i>S<sub>PVEs</sub></i>  | 1.00         | 3.00         | 1.00         | 5.00                     | 5.00                   | 1.00         | 1.00                   | 1.00                    |
| <i>SW<sub>HHEs</sub></i> | 0.33         | 1.00         | 0.20         | 1.00                     | 1.00                   | 1.00         | 0.33                   | 1.00                    |
| <i>S<sub>HES</sub></i>   | 0.33         | 1.00         | 0.20         | 1.00                     | 1.00                   | 1.00         | 0.50                   | 1.00                    |
| <i>DFGen</i>             | 0.33         | 1.00         | 1.00         | 1.00                     | 1.00                   | 1.00         | 0.33                   | 0.50                    |
| <i>B<sub>ESS</sub></i>   | 1.00         | 1.00         | 1.00         | 3.00                     | 2.00                   | 1.00         | 1.00                   | 1.00                    |
| <i>P<sub>HESs</sub></i>  | 1.00         | 1.00         | 1.00         | 1.00                     | 1.00                   | 3.00         | 1.00                   | 1.00                    |

TABLE S2.3 COMPARISON MATRIX (ALTERNATIVE X ALTERNATIVE) ON *EO*

|                          | $\mu_{HKES}$ | $\mu_{WTES}$ | <i>SPVEs</i> | <i>SW<sub>HHEs</sub></i> | <i>S<sub>HES</sub></i> | <i>DFGen</i> | <i>B<sub>ESS</sub></i> | <i>P<sub>HESs</sub></i> |
|--------------------------|--------------|--------------|--------------|--------------------------|------------------------|--------------|------------------------|-------------------------|
| $\mu_{HKES}$             | 1.00         | 3.00         | 1.00         | 5.00                     | 5.00                   | 1.00         | 1.00                   | 1.00                    |
| $\mu_{WTES}$             | 1.00         | 1.00         | 0.50         | 1.00                     | 1.00                   | 1.00         | 1.00                   | 1.00                    |
| <i>S<sub>PVEs</sub></i>  | 1.00         | 2.00         | 1.00         | 5.00                     | 5.00                   | 1.00         | 1.00                   | 1.00                    |
| <i>SW<sub>HHEs</sub></i> | 0.20         | 1.00         | 0.20         | 1.00                     | 1.00                   | 0.33         | 0.33                   | 0.33                    |
| <i>S<sub>HES</sub></i>   | 0.20         | 1.00         | 0.20         | 1.00                     | 1.00                   | 0.25         | 0.20                   | 0.25                    |
| <i>DFGen</i>             | 1.00         | 1.00         | 1.00         | 3.00                     | 4.00                   | 1.00         | 1.00                   | 1.00                    |
| <i>B<sub>ESS</sub></i>   | 1.00         | 1.00         | 1.00         | 3.00                     | 5.00                   | 1.00         | 1.00                   | 1.00                    |
| <i>P<sub>HESs</sub></i>  | 1.00         | 1.00         | 1.00         | 3.00                     | 4.00                   | 1.00         | 1.00                   | 1.00                    |

TABLE S2.4 COMPARISON MATRIX (ALTERNATIVE X ALTERNATIVE) ON *EL*

|                          | $\mu_{HKES}$ | $\mu_{WTES}$ | <i>SPVEs</i> | <i>SW<sub>HHEs</sub></i> | <i>S<sub>HES</sub></i> | <i>DFGen</i> | <i>B<sub>ESS</sub></i> | <i>P<sub>HESs</sub></i> |
|--------------------------|--------------|--------------|--------------|--------------------------|------------------------|--------------|------------------------|-------------------------|
| $\mu_{HKES}$             | 1.00         | 1.00         | 1.00         | 2.00                     | 2.00                   | 1.00         | 1.00                   | 1.00                    |
| $\mu_{WTES}$             | 1.00         | 1.00         | 0.50         | 1.00                     | 1.00                   | 1.00         | 1.00                   | 1.00                    |
| <i>S<sub>PVEs</sub></i>  | 1.00         | 2.00         | 1.00         | 3.00                     | 3.00                   | 1.00         | 1.00                   | 1.00                    |
| <i>SW<sub>HHEs</sub></i> | 0.50         | 1.00         | 0.33         | 1.00                     | 1.00                   | 0.33         | 0.50                   | 1.00                    |
| <i>S<sub>HES</sub></i>   | 0.50         | 1.00         | 0.33         | 1.00                     | 1.00                   | 0.33         | 0.33                   | 1.00                    |
| <i>DFGen</i>             | 1.00         | 1.00         | 1.00         | 3.00                     | 3.00                   | 1.00         | 1.00                   | 1.00                    |
| <i>B<sub>ESS</sub></i>   | 1.00         | 1.00         | 1.00         | 2.00                     | 3.00                   | 1.00         | 1.00                   | 1.00                    |
| <i>P<sub>HESs</sub></i>  | 1.00         | 1.00         | 1.00         | 1.00                     | 1.00                   | 1.00         | 1.00                   | 1.00                    |

TABLE S2.5 COMPARISON MATRIX (ALTERNATIVE X ALTERNATIVE) ON *CM*

|                          | $\mu_{HKES}$ | $\mu_{WTES}$ | <i>SPVEs</i> | <i>SW<sub>HHEs</sub></i> | <i>S<sub>HES</sub></i> | <i>DFGen</i> | <i>B<sub>ESS</sub></i> | <i>P<sub>HESs</sub></i> |
|--------------------------|--------------|--------------|--------------|--------------------------|------------------------|--------------|------------------------|-------------------------|
| $\mu_{HKES}$             | 1.00         | 7.00         | 1.00         | 5.00                     | 5.00                   | 1.00         | 1.00                   | 1.00                    |
| $\mu_{WTES}$             | 1.00         | 1.00         | 0.50         | 1.00                     | 1.00                   | 0.33         | 0.20                   | 0.33                    |
| <i>S<sub>PVEs</sub></i>  | 1.00         | 2.00         | 1.00         | 5.00                     | 3.00                   | 1.00         | 1.00                   | 1.00                    |
| <i>SW<sub>HHEs</sub></i> | 0.20         | 1.00         | 0.20         | 1.00                     | 1.00                   | 0.20         | 0.33                   | 0.33                    |
| <i>S<sub>HES</sub></i>   | 0.20         | 1.00         | 0.33         | 1.00                     | 1.00                   | 0.25         | 0.33                   | 0.25                    |
| <i>DFGen</i>             | 1.00         | 3.00         | 1.00         | 5.00                     | 4.00                   | 1.00         | 3.00                   | 1.00                    |
| <i>B<sub>ESS</sub></i>   | 1.00         | 5.00         | 1.00         | 3.00                     | 3.00                   | 1.00         | 1.00                   | 1.00                    |
| <i>P<sub>HESs</sub></i>  | 1.00         | 3.00         | 1.00         | 3.00                     | 4.00                   | 0.33         | 1.00                   | 1.00                    |

TABLE S2.6 COMPARISON MATRIX (ALTERNATIVE X ALTERNATIVE) ON *ADB*

|                         | $\mu HKES$ | $\mu WTES$ | <i>SPVEs</i> | <i>SW<sub>HES</sub></i> | <i>S<sub>HES</sub></i> | <i>DFGen</i> | <i>B<sub>ESS</sub></i> | <i>P<sub>HES</sub></i> |
|-------------------------|------------|------------|--------------|-------------------------|------------------------|--------------|------------------------|------------------------|
| $\mu HKES$              | 1.00       | 4.00       | 1.00         | 5.00                    | 5.00                   | 1.00         | 1.00                   | 1.00                   |
| $\mu WTES$              | 1.00       | 1.00       | 0.20         | 1.00                    | 1.00                   | 0.20         | 0.20                   | 0.33                   |
| <i>SPVEs</i>            | 1.00       | 5.00       | 1.00         | 7.00                    | 5.00                   | 1.00         | 1.00                   | 3.00                   |
| <i>SW<sub>HES</sub></i> | 0.20       | 1.00       | 0.14         | 1.00                    | 1.00                   | 0.20         | 0.20                   | 0.33                   |
| <i>S<sub>HES</sub></i>  | 0.20       | 1.00       | 0.20         | 1.00                    | 1.00                   | 0.33         | 0.25                   | 0.33                   |
| <i>DFGen</i>            | 1.00       | 5.00       | 1.00         | 5.00                    | 3.00                   | 1.00         | 1.00                   | 2.00                   |
| <i>B<sub>ESS</sub></i>  | 1.00       | 5.00       | 1.00         | 5.00                    | 4.00                   | 1.00         | 1.00                   | 2.00                   |
| <i>P<sub>HES</sub></i>  | 1.00       | 3.00       | 0.33         | 3.00                    | 3.00                   | 1.00         | 1.00                   | 1.00                   |

TABLE S2.7 COMPARISON MATRIX (ALTERNATIVE X ALTERNATIVE) ON *CI*

|                         | $\mu HKES$ | $\mu WTES$ | <i>SPVEs</i> | <i>SW<sub>HES</sub></i> | <i>S<sub>HES</sub></i> | <i>DFGen</i> | <i>B<sub>ESS</sub></i> | <i>P<sub>HES</sub></i> |
|-------------------------|------------|------------|--------------|-------------------------|------------------------|--------------|------------------------|------------------------|
| $\mu HKES$              | 1.000      | 1.000      | 1.000        | 3.000                   | 5.000                  | 1.000        | 2.000                  | 1.000                  |
| $\mu WTES$              | 1.000      | 1.000      | 0.333        | 2.000                   | 2.000                  | 1.000        | 0.500                  | 0.333                  |
| <i>SPVEs</i>            | 1.000      | 3.000      | 1.000        | 5.000                   | 4.000                  | 2.000        | 1.000                  | 1.000                  |
| <i>SW<sub>HES</sub></i> | 0.333      | 0.500      | 0.200        | 1.000                   | 1.000                  | 0.500        | 1.000                  | 1.000                  |
| <i>S<sub>HES</sub></i>  | 0.200      | 0.500      | 0.250        | 1.000                   | 1.000                  | 0.333        | 1.000                  | 1.000                  |
| <i>DFGen</i>            | 1.000      | 1.000      | 0.500        | 2.000                   | 3.000                  | 1.000        | 0.333                  | 0.200                  |
| <i>B<sub>ESS</sub></i>  | 0.500      | 2.000      | 1.000        | 1.000                   | 1.000                  | 1.000        | 1.000                  | 0.333                  |
| <i>P<sub>HES</sub></i>  | 1.000      | 3.000      | 1.000        | 1.000                   | 1.000                  | 3.000        | 1.000                  | 1.000                  |

TABLE S2.8 COMPARISON MATRIX (ALTERNATIVE X ALTERNATIVE) ON *PSR*

|                         | $\mu HKES$ | $\mu WTES$ | <i>SPVEs</i> | <i>SW<sub>HES</sub></i> | <i>S<sub>HES</sub></i> | <i>DFGen</i> | <i>B<sub>ESS</sub></i> | <i>P<sub>HES</sub></i> |
|-------------------------|------------|------------|--------------|-------------------------|------------------------|--------------|------------------------|------------------------|
| $\mu HKES$              | 1.00       | 1.00       | 1.00         | 4.00                    | 3.00                   | 2.00         | 1.00                   | 1.00                   |
| $\mu WTES$              | 1.00       | 1.00       | 0.50         | 3.00                    | 1.00                   | 1.00         | 0.50                   | 0.33                   |
| <i>SPVEs</i>            | 1.00       | 2.00       | 1.00         | 5.00                    | 5.00                   | 2.00         | 1.00                   | 1.00                   |
| <i>SW<sub>HES</sub></i> | 0.25       | 0.33       | 0.20         | 1.00                    | 1.00                   | 1.00         | 1.00                   | 0.33                   |
| <i>S<sub>HES</sub></i>  | 0.33       | 1.00       | 0.20         | 1.00                    | 1.00                   | 1.00         | 0.33                   | 0.25                   |
| <i>DFGen</i>            | 0.50       | 1.00       | 0.50         | 1.00                    | 1.00                   | 1.00         | 1.00                   | 0.20                   |
| <i>B<sub>ESS</sub></i>  | 1.00       | 2.00       | 1.00         | 1.00                    | 3.00                   | 1.00         | 1.00                   | 0.33                   |
| <i>P<sub>HES</sub></i>  | 1.00       | 3.00       | 1.00         | 3.00                    | 4.00                   | 1.00         | 1.00                   | 1.00                   |

TABLE S2.9 COMPARISON MATRIX (ALTERNATIVE X ALTERNATIVE) ON *TB*

|                         | $\mu HKES$ | $\mu WTES$ | <i>SPVEs</i> | <i>SW<sub>HES</sub></i> | <i>S<sub>HES</sub></i> | <i>DFGen</i> | <i>B<sub>ESS</sub></i> | <i>P<sub>HES</sub></i> |
|-------------------------|------------|------------|--------------|-------------------------|------------------------|--------------|------------------------|------------------------|
| $\mu HKES$              | 1.00       | 3.00       | 1.00         | 4.00                    | 3.00                   | 2.00         | 1.00                   | 3.00                   |
| $\mu WTES$              | 1.00       | 1.00       | 0.25         | 1.00                    | 1.00                   | 2.00         | 0.33                   | 0.33                   |
| <i>SPVEs</i>            | 1.00       | 4.00       | 1.00         | 6.00                    | 5.00                   | 2.00         | 1.00                   | 3.00                   |
| <i>SW<sub>HES</sub></i> | 0.25       | 1.00       | 0.17         | 1.00                    | 1.00                   | 2.00         | 0.20                   | 0.33                   |
| <i>S<sub>HES</sub></i>  | 0.33       | 1.00       | 0.20         | 1.00                    | 1.00                   | 1.00         | 0.33                   | 0.33                   |
| <i>DFGen</i>            | 0.50       | 0.50       | 0.50         | 0.50                    | 1.00                   | 1.00         | 0.25                   | 0.33                   |
| <i>B<sub>ESS</sub></i>  | 1.00       | 3.00       | 1.00         | 5.00                    | 3.00                   | 1.00         | 1.00                   | 1.00                   |
| <i>P<sub>HES</sub></i>  | 0.33       | 3.00       | 0.33         | 3.00                    | 3.00                   | 4.00         | 1.00                   | 1.00                   |

TABLE S2.10 COMPARISON MATRIX (ALTERNATIVE X ALTERNATIVE) ON *FIC*

|                         | $\mu HKES$ | $\mu WTES$ | <i>SPVEs</i> | <i>SW<sub>HES</sub></i> | <i>S<sub>HES</sub></i> | <i>DFGen</i> | <i>B<sub>ESS</sub></i> | <i>P<sub>HES</sub></i> |
|-------------------------|------------|------------|--------------|-------------------------|------------------------|--------------|------------------------|------------------------|
| $\mu HKES$              | 1.00       | 0.33       | 1.00         | 0.25                    | 0.20                   | 3.00         | 1.00                   | 1.00                   |
| $\mu WTES$              | 1.00       | 1.00       | 0.33         | 0.20                    | 0.14                   | 1.00         | 0.33                   | 1.00                   |
| <i>SPVEs</i>            | 1.00       | 3.00       | 1.00         | 1.00                    | 0.50                   | 3.00         | 1.00                   | 1.00                   |
| <i>SW<sub>HES</sub></i> | 4.00       | 5.00       | 1.00         | 1.00                    | 1.00                   | 2.00         | 1.00                   | 2.00                   |
| <i>S<sub>HES</sub></i>  | 5.00       | 7.00       | 2.00         | 1.00                    | 1.00                   | 3.00         | 0.33                   | 0.50                   |
| <i>DFGen</i>            | 0.33       | 1.00       | 0.33         | 0.50                    | 0.33                   | 1.00         | 0.20                   | 0.50                   |
| <i>B<sub>ESS</sub></i>  | 1.00       | 3.00       | 1.00         | 1.00                    | 3.00                   | 1.00         | 1.00                   | 1.00                   |
| <i>P<sub>HES</sub></i>  | 1.00       | 1.00       | 1.00         | 0.50                    | 2.00                   | 5.00         | 1.00                   | 1.00                   |

**S3. Various specifications of hydrokinetic turbines ( $\mu H_{KES}$ ), solar photovoltaic ( $S_{PVES}$ ) modules and battery ( $B_{ESS}$ ), Diesel Fuel Genset ( $D_{FGen}$ ) and converter based on manufacture datasheet**

Table S3. 1 Various key specification of different models of  $\mu H_{KES}$  [2-8]

| Manufacturer                        | Smart Hydro Power                                        |                 | New Energy Corporations                                  |                | Vortex Hydrokinetics                                 | Idénergie Inc                                            | Gruinard Energies                                        |
|-------------------------------------|----------------------------------------------------------|-----------------|----------------------------------------------------------|----------------|------------------------------------------------------|----------------------------------------------------------|----------------------------------------------------------|
| $\mu H_{KES}$ Alternatives          | $\mu H_{KES1}$                                           | $\mu H_{KES2}$  | $\mu H_{KES3}$                                           | $\mu H_{KES4}$ | $\mu H_{KES5}$                                       | $\mu H_{KES6}$                                           | $\mu H_{KES7}$                                           |
| Model                               | Monofloat [2]                                            | Free stream [3] | EVG-005H [4]                                             | EVG-025H [5]   | SETUR-L [6]                                          | Riverlution [7]                                          | P-66 [8]                                                 |
| Rated Power (kW)                    | 5                                                        | 5               | 5                                                        | 25             | 5                                                    | 0.5                                                      | 3.5                                                      |
| Rated water velocity (m/s)          | 3.1                                                      |                 | 3                                                        |                | 4                                                    | 3.5                                                      | 3                                                        |
| Mounting                            | Floating / Fixed                                         |                 |                                                          |                |                                                      |                                                          |                                                          |
| Required minimum river depth (m)    | 2                                                        | 1.1             | 1.22                                                     | 3              | 1                                                    | 0.6                                                      | 1.5                                                      |
| Environmental Impact                | None                                                     |                 | Low                                                      | Moderate       | None                                                 | Low                                                      | Low                                                      |
| Scalable (Unit Addition Provisions) | Yes                                                      |                 | Limited                                                  |                | Yes                                                  | Yes                                                      | Limited                                                  |
| Debris Protection                   | Yes                                                      |                 | Limited                                                  |                | Limited                                              | Yes                                                      | Yes                                                      |
| Rated AC Voltage (V)                | 3 $\phi$ , 0—400 V (region/site-based design provisions) |                 | 3 $\phi$ , 0—300 V (region/site-based design provisions) |                | 1 $\phi$ , 120 / 240 V<br>3 $\phi$ , 120 / 208/400 V | 3 $\phi$ , 0—300 V (region/site-based design provisions) | 3 $\phi$ , 0—300 V (region/site-based design provisions) |
| Frequency (Hz)                      | 50/60 Hz                                                 |                 | 50/60 Hz                                                 |                | 50/60 Hz                                             | 50/60 Hz                                                 | 50/60 Hz                                                 |
| Weight (Kg)                         | 380                                                      | 300             | 250                                                      | 1500           | 300                                                  | 131                                                      | 90                                                       |
| Unit Cost (USD)                     | 17774.04                                                 | 15226.18        | 19505.12                                                 | 26987.16       | 127545.20                                            | 9728.18                                                  | 60953.50                                                 |

Table S3.2 Specification of different models of  $S_{PVES}$  [9-13]

| Manufacturer                                  | Adani Solar [9]                                  |           |           |           | EMMVEE PV Pvt. Ltd. [10]                  |                                           |                                           |                                           | Vikram Solar [11, 12]                     |                            |                            |                            |                            |                            | Goldi Green [13]           |                            |
|-----------------------------------------------|--------------------------------------------------|-----------|-----------|-----------|-------------------------------------------|-------------------------------------------|-------------------------------------------|-------------------------------------------|-------------------------------------------|----------------------------|----------------------------|----------------------------|----------------------------|----------------------------|----------------------------|----------------------------|
| Panel Model                                   | ETERNAL Series [9]                               |           |           |           | 60-270                                    | 60-280                                    | 72-320                                    | 72-330                                    | Somera Prime[11]                          |                            |                            | Somera Grand[12]           |                            |                            | 72-330                     | 72-345                     |
|                                               | 72-335                                           | 72-340    | 72-345    | 72-350    |                                           |                                           |                                           |                                           | 60-285                                    | 60-300                     | 60-310                     | 72-345                     | 72-360                     | 72-370                     |                            |                            |
| $S_{PVES}$ alternatives                       | $S_{PV1}$                                        | $S_{PV2}$ | $S_{PV3}$ | $S_{PV4}$ | $S_{PV5}$                                 | $S_{PV6}$                                 | $S_{PV7}$                                 | $S_{PV8}$                                 | $S_{PV9}$                                 | $S_{PV10}$                 | $S_{PV11}$                 | $S_{PV12}$                 | $S_{PV13}$                 | $S_{PV14}$                 | $S_{PV15}$                 | $S_{PV16}$                 |
| Total number of cells/panel and type          | Mono-crystalline, 72 cells                       |           |           |           | Mono-crystalline, 60 cells                | Mono-crystalline, 72 cells                | Mono-crystalline, 60 cells                | Mono-crystalline, 72 cells                | Mono-crystalline, 60 cells                | Mono-crystalline, 72 cells | Mono-crystalline, 72 cells | Mono-crystalline, 72 cells | Mono-crystalline, 72 cells | Mono-crystalline, 72 cells | Mono-crystalline, 72 cells | Mono-crystalline, 72 cells |
| Normal operating cell temperature (NOCT) (°C) | 44°C ± 2°C                                       |           |           |           | 48°C ± 2°C                                |                                           |                                           |                                           | 45°C ± 2°C                                |                            |                            |                            |                            |                            | 45°C ± 2°C                 |                            |
| Temperature range (°C)                        | -40°C to + 85°C                                  |           |           |           |                                           |                                           |                                           |                                           |                                           |                            |                            |                            |                            |                            |                            |                            |
| Panel dimension (mm)                          | Length =1976<br>Width = 992<br>Height= 35/40     |           |           |           | Length =1640<br>Width = 990<br>Height= 35 | Length =1970<br>Width = 990<br>Height= 35 | Length =1640<br>Width = 992<br>Height= 36 | Length =1956<br>Width = 992<br>Height= 36 | Length =1955<br>Width = 990<br>Height= 42 |                            |                            |                            |                            |                            |                            |                            |
| Panel weight (kg)                             | 22 kg for 35 mm height<br>27 kg for 40 mm height |           |           |           | 17.7                                      | 21                                        | 18                                        | 22                                        | 22                                        |                            |                            |                            |                            |                            |                            |                            |
| Panel Rated Efficiency (%) @STC*              | 17.09                                            | 17.34     | 17.6      | 17.85     | 16.63                                     | 17.25                                     | 16.41                                     | 16.92                                     | 17.52                                     | 18.44                      | 19.05                      | 17.78                      | 18.55                      | 19.07                      | 17.05                      | 17.83                      |
| Power Output (W) @NOCT                        | 244.9                                            | 248.6     | 253.2     | 256.1     | 195                                       | 202                                       | 234.2                                     | 246                                       | 213                                       | 222                        | 229                        | 251.5                      | 262.4                      | 269.7                      | 237.6                      | 248.4                      |
| Voltage at maximum power output (V) @NOCT     | 34.79                                            | 35.08     | 35.33     | 35.61     | 28.4                                      | 28.7                                      | 33                                        | 34.9                                      | 30.5                                      | 31.1                       | 31.5                       | 27.8                       | 27.9                       | 28                         | 34.05                      | 34.88                      |
| Current at maximum power output (A) @NOCT     | 7.04                                             | 7.09      | 7.17      | 7.19      | 6.87                                      | 7.04                                      | 7.11                                      | 7.04                                      | 6.95                                      | 7.20                       | 7.35                       | 8.27                       | 8.58                       | 8.79                       | 6.98                       | 7.12                       |
| Open-circuit voltage (V) @NOCT                | 42.98                                            | 43.19     | 43.4      | 43.64     | 35                                        | 35.3                                      | 41.41                                     | 43                                        | 38.4                                      | 38.9                       | 39.3                       | 37.8                       | 38.2                       | 38.4                       | 42.86                      | 43.41                      |
| Short-circuit current (A) @NOCT               | 7.64                                             | 7.71      | 7.76      | 7.84      | 7.44                                      | 7.63                                      | 7.41                                      | 7.49                                      | 7.46                                      | 7.68                       | 7.86                       | 8.82                       | 9.20                       | 9.45                       | 7.32                       | 7.56                       |
| Module Cost (USD)                             | 179.3                                            | 181.9     | 184.6     | 187.3     | 140.4                                     | 145.6                                     | 166.4                                     | 171.6                                     | 136.5                                     | 143.7                      | 150.9                      | 165.2                      | 172.4                      | 177.2                      | 180.6                      | 188.9                      |

Table S3.3 Key specification of different models of  $B_{ESS}$  [14-16]

| Manufacturer                                       |           | Discover Battery [14]               | CROWN Battery [15]                  | Trojan Battery Company [16]         |                                     |                 |                 |                 |                 |
|----------------------------------------------------|-----------|-------------------------------------|-------------------------------------|-------------------------------------|-------------------------------------|-----------------|-----------------|-----------------|-----------------|
| Model                                              |           | 12VRE-3000TF                        | 12CRV100 AGM                        | SAGM 12 135                         | SSIG 12 255                         | SSIG 12 230     | J200-RE         | SSIG 12 170     | SSIG 12 120     |
| $B_{ESS}$ alternatives                             |           | $B_{ESS1}$                          | $B_{ESS2}$                          | $B_{ESS3}$                          | $B_{ESS4}$                          | $B_{ESS4}$      | $B_{ESS6}$      | $B_{ESS7}$      | $B_{ESS8}$      |
| Nominal Voltage (v)                                |           | 12                                  |                                     |                                     |                                     |                 |                 |                 |                 |
| Life Cycle                                         | @20 % DOD | 5000                                | 1100                                | 4500                                | 3000                                | 3000            | 4000            | 3000            | 1500            |
|                                                    | @50% DOD  | 2500                                | 600                                 | 1600                                | 1250                                | 1250            | 1600            | 1100            | 600             |
|                                                    | @80% DOD  | 1500                                | 325                                 | 1000                                | 650                                 | 700             | 1000            | 700             | 400             |
| Nominal Capacity (kWh)                             |           | 3.11                                | 1.22                                | 1.62                                | 3.06                                | 2.76            | 2.64            | 2.04            | 1.44            |
| Capacity in Ampere Hour (Ah)                       | @100 Hr   | 243                                 | 105                                 | 137                                 | 255                                 | 230             | 220             | 170             | 120             |
|                                                    | @20 Hr    | 215                                 | 98                                  | 135                                 | 229                                 | 209             | 200             | 153             | 107             |
|                                                    | @10 Hr    | 190                                 | N/A                                 | 131                                 | 211                                 | 192             | 176             | 136             | 99              |
| Internal Resistance (m $\Omega$ )                  |           | 5+/-1.5                             | 3.45                                | 4.3                                 | 5.3                                 | N/A             | 5.3             | N/A             | N/A             |
| Short Circuit Current (A)                          |           | 2150                                | 3370                                | 2920                                | 2321                                | N/A             | 2321            | N/A             | N/A             |
| Operating Temperature ( $^{\circ}$ C)              |           | -35 $^{\circ}$ C to 50 $^{\circ}$ C | -20 $^{\circ}$ C to 49 $^{\circ}$ C | -20 $^{\circ}$ C to 50 $^{\circ}$ C | -20 $^{\circ}$ C to 45 $^{\circ}$ C |                 |                 |                 |                 |
| Battery Dimensions (length x width x height in mm) |           | 500 x 187 x 370                     | 330 x 171 x 206                     | 329 x 179 x 278                     | 380 x 176 x 373                     | 380 x 176 x 373 | 380 x 176 x 374 | 354 x 181 x 272 | 326 x 168 x 247 |
| Weight (kg)                                        |           | 65                                  | 25.9                                | 38                                  | 56                                  | 52              | 60              | 38              | 25              |
| Single Unit cost (USD)                             |           | 297.00                              | 400.00                              | 350.00                              | 325.00                              | 292.00          | 350.00          | 225.00          | 160.00          |

Table S3.4 Diesel Fuel Genset specifications based on manufacturer datasheet [17]

| Sl. no | Specifications            |               | Unit      | Various Genset Data               |      |     |     |     |      |      |      |      |
|--------|---------------------------|---------------|-----------|-----------------------------------|------|-----|-----|-----|------|------|------|------|
|        | Rated Power @ RPM         |               | kVA       | 5                                 | 7.5  | 10  | 15  | 20  | 25   | 30   | 40   | 45   |
|        |                           |               | kW        | 4                                 | 6    | 8   | 12  | 16  | 24   | 24   | 32   | 36   |
| 1.     | Frequency                 |               | Hz        | 50                                |      |     |     |     |      |      |      |      |
| 2.     | Power factor              |               | lagging   | 0.8                               |      |     |     |     |      |      |      |      |
| 3.     | Voltage                   |               | V         | 230 (1 $\phi$ ) & 415 (3 $\phi$ ) |      |     |     |     |      |      |      |      |
| 4.     | Noise Level               |               | dBA       | <75                               |      |     |     |     |      |      |      |      |
| 5.     | Fuel consumption          | At 100 % load | Ltrs./Hr. | 1.6                               | 2.21 | 3   | 4   | 5.1 | 5.8  | 7.6  | 9.2  | 10.3 |
|        |                           | At 75 % load  | Ltrs./Hr. | 1.3                               | 1.62 | 2.4 | 3   | 3.8 | 4.4  | 5.8  | 7.4  | 8.7  |
|        |                           | At 50 % load  | Ltrs./Hr. | 1                                 | 1.21 | 1.8 | 2.2 | 2.7 | 2.9  | 4.4  | 5.5  | 5.9  |
| 6.     | Genset weight with canopy | Dry           | Kg.       | 640                               | 650  | 710 | 810 | 880 | 1040 | 1040 | 1180 | 1180 |
|        |                           | Wet           |           | 890                               | 700  | 760 | 860 | 930 | 1090 | 1090 | 1215 | 1215 |

Table S3.5 Various converter model with their specifications [18]

| Model                                 | MTP-412F                                                           | MTP-413E | MTP-414F | MTP-415F | MTP-416F |
|---------------------------------------|--------------------------------------------------------------------|----------|----------|----------|----------|
| Manufacturer                          | Leonics [18]                                                       |          |          |          |          |
| Rated Power (kW)                      | 15                                                                 | 25       | 30       | 45       | 50       |
| Nominal input DC Voltage (V)          | 230, 380, 415 V                                                    |          |          |          |          |
| Maximum AC Current (A)                | 151.1                                                              | 227.3    | 303      | 378.8    | 454.5    |
| Weight (kg)                           | 360                                                                | 460      | 500      | 550      | 805      |
| AC Input Voltage (V)                  | 380/400/415 Vac (L-L), 220/230/240 Vac (L-N) $\pm$ 10 %            |          |          |          |          |
| AC Output Voltage (V)                 | 380/400/415 Vac (L-L), 220/230/240 Vac (L-N)                       |          |          |          |          |
| Frequency (Hz)                        | 50/60 Hz $\pm$ 0.1 %                                               |          |          |          |          |
| Distortion (%)                        | THD < 4%                                                           |          |          |          |          |
| Efficiency (%)                        | 95 %                                                               |          |          |          |          |
| Protection                            | Short Circuit, Overload, Overvoltage, Overcurrent, Overtemperature |          |          |          |          |
| Operating temperature ( $^{\circ}$ C) | 0-45 $^{\circ}$ C                                                  |          |          |          |          |
| Relative Humidity (%)                 | 0-95 % (Non-condensing)                                            |          |          |          |          |
| Cooling                               | Automatic Air-cooled system                                        |          |          |          |          |

**Table S3.6 Various microgrid component cost and simulation parameters**

| Details of various component                                         |                                               |                         |                                       | Capital Cost | Replacement Cost          | Operation & Maintenance Cost | Life              |
|----------------------------------------------------------------------|-----------------------------------------------|-------------------------|---------------------------------------|--------------|---------------------------|------------------------------|-------------------|
|                                                                      |                                               |                         |                                       | USD          | USD                       | USD                          | Years             |
| PV module ( $S_{PVES}$ )/0.31 kW [19]                                |                                               |                         |                                       | 150.92       | 150.92                    | 2.5/ year                    | 25                |
| Free Stream Hydrokinetic Turbine System ( $\mu H_{KES}$ ) / 5kW [20] |                                               |                         |                                       | 15226.18     | 15226.18                  | 100 / year                   | 15                |
| Battery ( $B_{ESS}$ )/3kWh                                           |                                               |                         |                                       | 297          | 297                       | 10/ year                     | As per life cycle |
| Converter /kW                                                        |                                               |                         |                                       | 200          | 200                       | 0                            | 10                |
| Diesel Fuel Genset ( $D_{FGen}$ ) /kW                                |                                               |                         |                                       | 206          | 206                       | 0.15/ hour                   | 15                |
| Pump hydro energy storage ( $P_{HESS}$ ) [21, 22]                    | Capacity of upper reservoir (m <sup>3</sup> ) | Head ( $h_{phss}$ ) (m) | Reservoir dimensions (L x W x D) in m |              |                           |                              |                   |
|                                                                      | 1000                                          | 50                      | 15.55 x10.53 x 6.11                   | 27377        | 27377                     | 250/year                     | 15                |
|                                                                      | 1000                                          | 70                      | 17.43 x 10.7 x 5.36                   | 34221        | 34221                     | 285/year                     | 15                |
|                                                                      | 1000                                          | 80                      | 18.5 x 12.8 x 4.22                    | 38328        | 38328                     | 380/year                     | 15                |
|                                                                      | 1000                                          | 100                     | 20.4 x 12.5 x 3.92                    | 45172        | 45172                     | 425/year                     | 15                |
|                                                                      | 1500                                          | 70                      | 18.5 x 14.45 x 5.61                   | 51332        | 51332                     | 450/year                     | 15                |
|                                                                      | 1500                                          | 80                      | 18 x 15.5 x 5.38                      | 57492        | 57492                     | 520/year                     | 15                |
|                                                                      | 1500                                          | 100                     | 20 x 16.32 x 4.60                     | 71865        | 71865                     | 625/year                     | 15                |
|                                                                      | 2000                                          | 80                      | 21.5 x 15.8 x 5.89                    | 84869        | 84869                     | 800/year                     | 15                |
|                                                                      | 2000                                          | 90                      | 22.56 x16.35 x 5.42                   | 95820        | 95820                     | 1000/year                    | 15                |
| 2000                                                                 | 100                                           | 23.25 x17.32 x 4.97     | 114984                                | 114984       | 1150/year                 | 15                           |                   |
| Other key simulation parameters                                      |                                               |                         |                                       |              |                           |                              |                   |
| Average Currency Conversion Rate (EURO* to USD\$)                    |                                               |                         |                                       |              | 1 Euro = 1.21907 USD [23] |                              |                   |
| Average Currency Conversion Rate (USD\$ to INR <sup>₹</sup> )        |                                               |                         |                                       |              | 1 USD = 73.0536 [23]      |                              |                   |
| Nominal Discount Rate                                                |                                               |                         |                                       |              | 10.57 % [19]              |                              |                   |
| Assume Project Period                                                |                                               |                         |                                       |              | 10 years                  |                              |                   |
| Assumed electrical load demand growth rate (%/year)                  |                                               |                         |                                       |              | 5% [24, 25]               |                              |                   |
| Diesel Fuel Rate                                                     |                                               |                         |                                       |              | 0.95 [26]                 |                              |                   |
| Average inflation rate (2020)                                        |                                               |                         |                                       |              | 5.35% [27]                |                              |                   |

USD\* = United States Dollars, INR<sup>₹</sup> = Indian National Rupees

**Table S3.7 Assumed scaling to assess the aquatic life impacts of the river**

| Sl.No | Microgrid System Description                                                    | Qualitative Impact Scale | Assumed Quantitative Scale |
|-------|---------------------------------------------------------------------------------|--------------------------|----------------------------|
| 1     | System with no $\mu H_{KES}$ and $P_{HESS}$ units.                              | None                     | 0                          |
| 2.    | System with only single $\mu H_{KES}$ units.                                    | Moderate                 | 1                          |
| 3.    | System with single $P_{HESS}$ units.                                            | Low                      | 2                          |
| 4.    | System with multiple $\mu H_{KES}$ units (below 5).                             | High                     | 3                          |
| 5.    | System with multiple $\mu H_{KES}$ units (below 5) and single $P_{HESS}$ units. |                          |                            |
| 6.    | System with many $\mu H_{KES}$ units (above 5).                                 | Highest                  | 4                          |
| 7.    | System with many $\mu H_{KES}$ units (above 5) and single $P_{HESS}$ units.     |                          |                            |

## References:

- [1] T. L. Saaty, and L. G. Vargas, *Models, Methods, Concepts & Applications of the Analytic Hierarchy Process*, 2 ed.: Springer US, 2012.
- [2] S. H. Power. "Data Sheet for SMART MONOFLOAT Turbines " 06-08-2020; [https://www.smart-hydro.de/wp-content/uploads/2015/12/Datasheet\\_SMART\\_Freestream.pdf](https://www.smart-hydro.de/wp-content/uploads/2015/12/Datasheet_SMART_Freestream.pdf).
- [3] S. H. Power. "Datasheet for SMART Free Stream Turbine "; [https://www.smart-hydro.de/wp-content/uploads/2015/12/Datasheet\\_SMART\\_Freestream.pdf](https://www.smart-hydro.de/wp-content/uploads/2015/12/Datasheet_SMART_Freestream.pdf).
- [4] N. E. Corporations, "Datasheet for EnviroGen 005 Series Turbine ".
- [5] N. E. Corporations, "Datasheet for EnviroGen 025 Series Turbines ".
- [6] V. H. LLC. "Datasheet for Bladeless SETUR turbines," [https://vortexhydro.com/wp-content/uploads/2020/09/SETUR\\_turbine\\_Specs.pdf](https://vortexhydro.com/wp-content/uploads/2020/09/SETUR_turbine_Specs.pdf).
- [7] I. Inc. "Datasheet for Riverlution Turbine," <https://idenergie.ca/wp-content/uploads/2016/11/Brochure-Id%C3%A9nergie-Riverlution-Turbine-2016-EN.pdf>.
- [8] G. E. N.-A. Group. "Datasheet for P66 Hydrokinetic turbine," <https://www.guinard-energies.bzh/wp-content/uploads/Flyer-P66-Guinard-Energies.pdf>.
- [9] A. Solar, "Datasheet for ETERNAL Series Mono-crystalline PERC Silicon Solar PV Modules ".
- [10] E. P. Power, "Datasheet for Mono PERC Module."
- [11] V. Solar. "Datasheet for SOMERA PRIME," <https://35bjk3fzaio4epare24j5l9-wpengine.netdna-ssl.com/wp-content/uploads/2017/11/Somera-Prime-1500V.pdf>.
- [12] V. Solar. "Datasheet for SOMERA GRAND," <https://35bjk3fzaio4epare24j5l9-wpengine.netdna-ssl.com/wp-content/uploads/2017/11/Somera-Grand-1500V-2.pdf>.
- [13] G. Solar. "Datasheet for Goldi 72 GN1 Mono PERC "; <https://www.goldisolar.com/mono-modules/#>.
- [14] D. E. Corporation. "Data Sheet for 12VRE-3000TF-L," 06-11-2017; <http://discoverbattery.com/product-search/view/12VRE-3000TF-L>.
- [15] C. Battery. "Datasheet for 12CRV100 AGM Deep Cycle Battery "; <http://atlanticbatterysystems.com/wp-content/uploads/12CRV100.pdf>.
- [16] T. B. Company. "Datasheets and literature of 12 Volt Deep-Cycle Flooded Batteries," <https://www.trojanbattery.com/literature/#datasheets>.
- [17] I. Kirloskar Oil Engine Limited (KOEL). "KOEL iGREEN Diesel Generator," 06-11-2017; <https://www.koelgreen.com/diesel-generator>.
- [18] T. Leonics. "Datasheet for APOLLO MTP- 410," 06-11-2017; <http://www.leonics.com/product/renewable/inverter/dl/MTP-410-091.pdf>.
- [19] *Determination of levellised generic tariff for FY 2019-20 under Regulation 8 of the Central Electricity Regulatory Commission (Terms and Conditions for Tariff determination from Renewable Energy Sources)* G. o. I. Central Electricity Regulatory Commission, 2019.
- [20] S. H. Power. "SMART PRICES & PRODUCTS OVERVIEW," 06-08-2020; <https://www.smart-hydro.de/renewable-energy-systems/prices-hydrokinetic-photovoltaic/>.
- [21] G. o. A. P. Public Work Department, *Analysis of Rates 2014*.
- [22] G. o. A. P. Public Work Department, "Schedule of Rates (APSR)."
- [23] X-Rates. "Historical Monthly Exchange Rates "; <https://www.xrates.com/average/?from=USD&to=INR&amount=1&year=2020>.
- [24] I. E. Agency, "World Energy Outlook ", 2020.
- [25] W. B. Group, *Global Economic Prospects, June 2020*, World Bank, Washington, DC, 2020.
- [26] I. Indian Oil Corporation Limited. "Prices of non-branded Diesel across state capitals (Rs./Litre)," <https://iocl.com/Products/PetrolDieselPrices.aspx>.
- [27] T. M. BV. "Historic inflation India - average inflation India (CPI) - by year," <https://www.inflation.eu/en/inflation-rates/india/historic-inflation/cpiinflation-india-2020.aspx>.
